# Supplementary material for: Precise Klebsiella pneumoniae carbapenem resistance prediction by Zn–Cu/MOF-embedded hybrid nanosheet-assisted carbapenemase activity analysis
Source: Royal Society of Chemistry journal article supplement (doi:10.1039/d5an00967g), 2025-12-08
Supplement: d5an00967g1.pdf [file d5an00967g1.pdf]

## Supplementary Information

### **Precise *Klebsiella Pneumoniae* Carbapenem Resistance Prediction by Zn-Cu/MOFs-Embedded Hybrid Nanosheet- Assisted Carbapenemase Activity Analysis**

Chenyao Lin<sup>1</sup>, Qiaoping Wu<sup>1</sup>, Menglu Mao<sup>1</sup>, Xuedan Qiu<sup>1</sup>, Chuanfan Ding<sup>2</sup>, Yinghua

Yan<sup>2</sup>, Dumei Ma<sup>2\*</sup>, Qingcao Li<sup>1\*</sup>

<sup>1</sup>Department of Clinical Laboratory, The Affiliated LiHuiLi Hospital of Ningbo University, Ningbo 315100, P. R. China;

<sup>2</sup>Key Laboratory of Advanced Mass Spectrometry and Molecular Analysis of Zhejiang Province, Ningbo 315211, China

*\*Corresponding author: Qingcao Li, Dumei Ma*

*E-mail: lqc\_lab@163.com, madumei@nbu.edu.cn.*

## Table of contents

|                                                                                                                                                                                     |            |
|-------------------------------------------------------------------------------------------------------------------------------------------------------------------------------------|------------|
| <b>MALDI-TOF MS analysis .....</b>                                                                                                                                                  | <b>S4</b>  |
| <b>Characterization.....</b>                                                                                                                                                        | <b>S4</b>  |
| <b>Fig. S1.</b> Distribution of <i>K. pneumoniae</i> isolates across different clinical specimen types .....                                                                        | <b>S5</b>  |
| <b>Fig. S2.</b> Dispersion behavior of GNP@Zn-Cu/MOF@Au at different concentrations .....                                                                                           | <b>S6</b>  |
| <b>Fig. S3.</b> Representative mass spectra of KPC-2–producing <i>K. pneumoniae</i> strains obtained from imipenem hydrolysis assays at varying incubation times .....              | <b>S7</b>  |
| <b>Fig. S4.</b> Representative mass spectra of NDM-1–producing <i>K. pneumoniae</i> strains obtained from imipenem hydrolysis assays at varying incubation times .....              | <b>S8</b>  |
| <b>Fig. S5.</b> Representative mass spectra of IMP-1–producing <i>K. pneumoniae</i> strains obtained from imipenem hydrolysis assays at varying incubation times .....              | <b>S9</b>  |
| <b>Fig. S6.</b> Representative mass spectra of OXA-48–producing <i>K. pneumoniae</i> strains obtained from imipenem hydrolysis assays at varying incubation times .....             | <b>S10</b> |
| <b>Fig. S7.</b> Representative mass spectra of KPC-3–producing <i>K. pneumoniae</i> strains obtained from imipenem hydrolysis assays at varying incubation times .....              | <b>S11</b> |
| <b>Fig. S8.</b> Representative mass spectra of <i>K. pneumoniae</i> strains co-producing KPC-2 and IMP-1 obtained from imipenem hydrolysis assays at varying incubation times ..... | <b>S12</b> |
| <b>Fig. S9.</b> Representative mass spectra of the IMP-4–producing <i>K. pneumoniae</i> strain obtained from imipenem hydrolysis assays at varying incubation times .....           | <b>S13</b> |
| <b>Fig. S10.</b> Representative mass spectra of the <i>K. pneumoniae</i> strain co-producing KPC-2                                                                                  |            |

and NDM-1 obtained from imipenem hydrolysis assays at varying incubation times  
..... S14

**Fig.S11.** Representative mass spectra of the *K. pneumoniae* strain co-producing KPC-  
2 and IMP-4 obtained from imipenem hydrolysis assays at varying incubation times  
..... S15

## **MALDI-TOF MS analysis**

Mass spectra were acquired using an UltrafleXtreme MALDI-TOF/TOF MS (Bruker Daltonic, USA) which was operated by an improved Nd:YAG laser with a detection frequency of 1000 Hz. The analysis mode was set to reflective-positive mode with a laser intensity of 70%, a cumulative laser count of 2,000, and a mass-to-charge ratio detection range of 100 to 1,000 Da. MALDI-TOF MS data were collected from Flexcontrol 3.4 and processed in Flexanalysis 3.4.

## **Characterization**

Deionized water was got through using Milli-Q IQ 7000. Scanning electron microscopy (SEM) was characterized by Keol 2012 microscope. Transmission electron microscopy (TEM) was characterized by JEOL 1011 microscopy (Japan). Fourier transform infrared spectra (FT-IR) was characterized by Thermo Fisher Scientific 10 infrared spectrometer analysis.

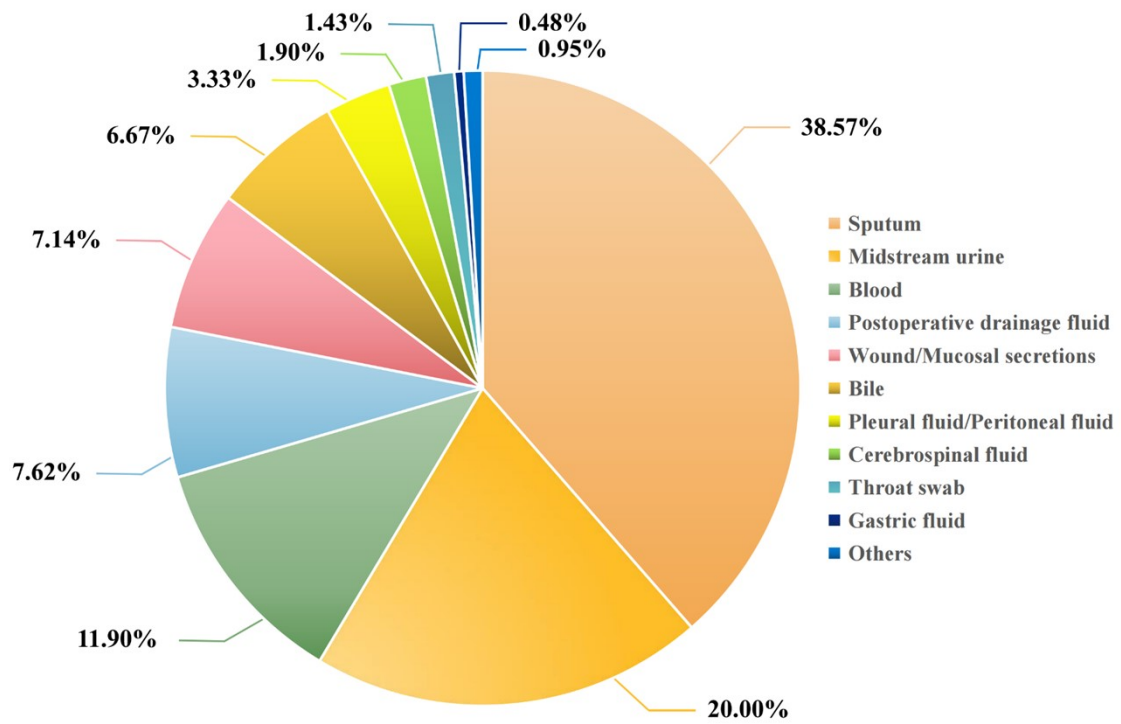

**Fig. S1.** Distribution of *K. pneumoniae* isolates across different clinical specimen types.

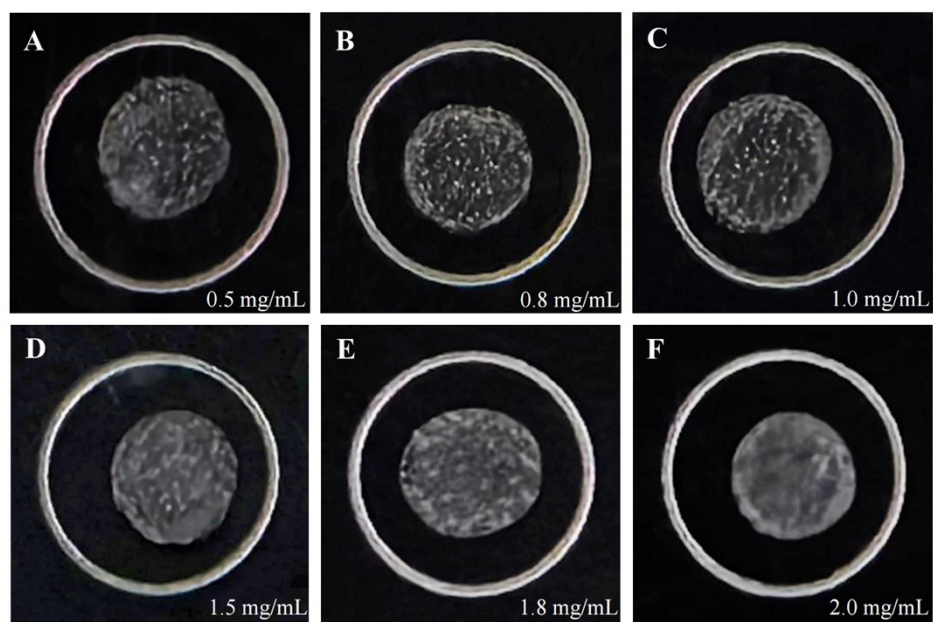

**Fig. S2.** Dispersion behavior of GNP@Zn-Cu/MOF@Au at different concentrations. (A) 0.5 mg/mL; (B) 0.8 mg/mL; (C) 1.0 mg/mL; (D) 1.5 mg/mL; (E) 1.8 mg/mL; (5) 2.0 mg/mL.

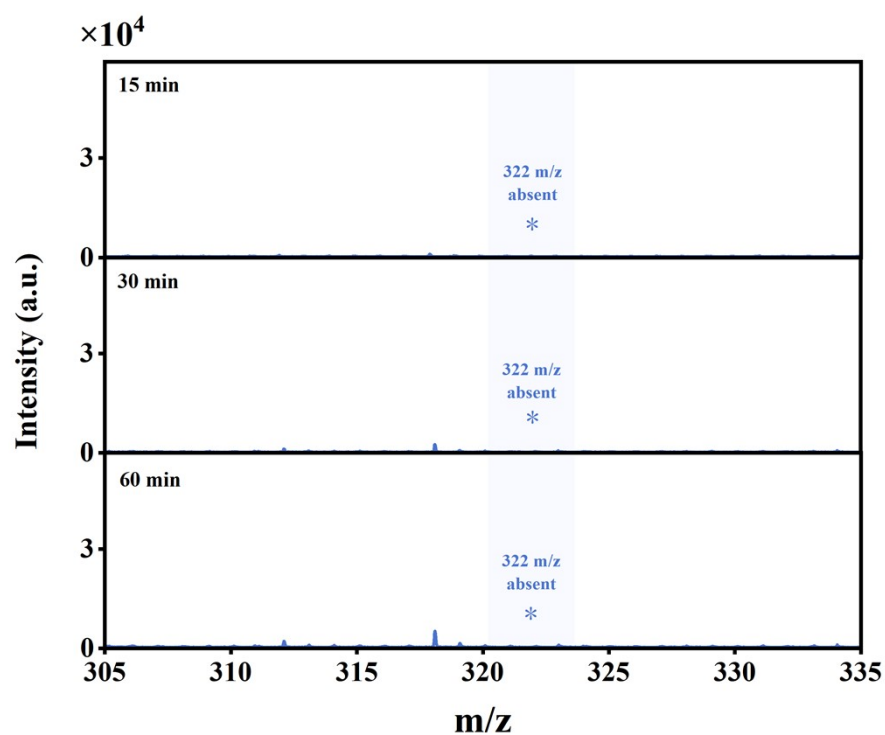

**Fig. S3.** Representative mass spectra of KPC-2-producing *K. pneumoniae* strains ( $n = 71$ ) from imipenem hydrolysis assays at different incubation times (15 min, 30 min, and 1 h). In all strains, the  $[\text{Imipenem} + \text{Na}]^+$  peak at 322  $m/z$  disappeared completely after 15 min.

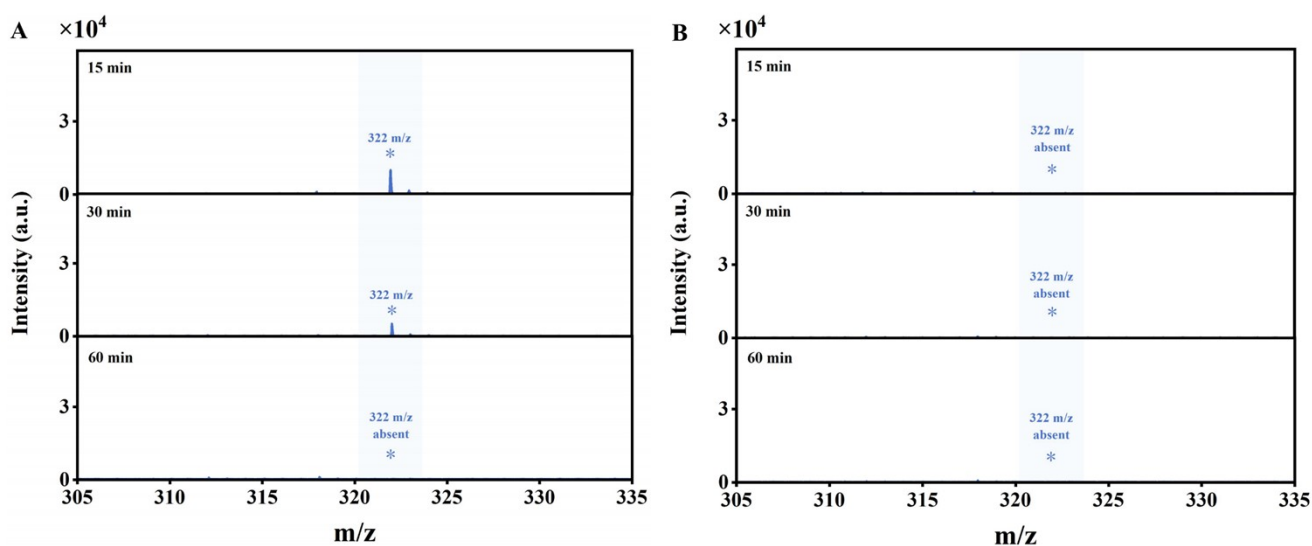

**Fig. S4.** Representative mass spectra of NDM-1–producing *K. pneumoniae* strains (n = 20) from imipenem hydrolysis assays at different incubation times (15 min, 30 min, and 1 h). (A) In one strain, the [Imipenem + Na]<sup>+</sup> peak at 322 m/z persisted at 15 and 30 min but disappeared by 60 min. (B) In the remaining 19 strains, the 322 m/z peak disappeared completely after 15 min.



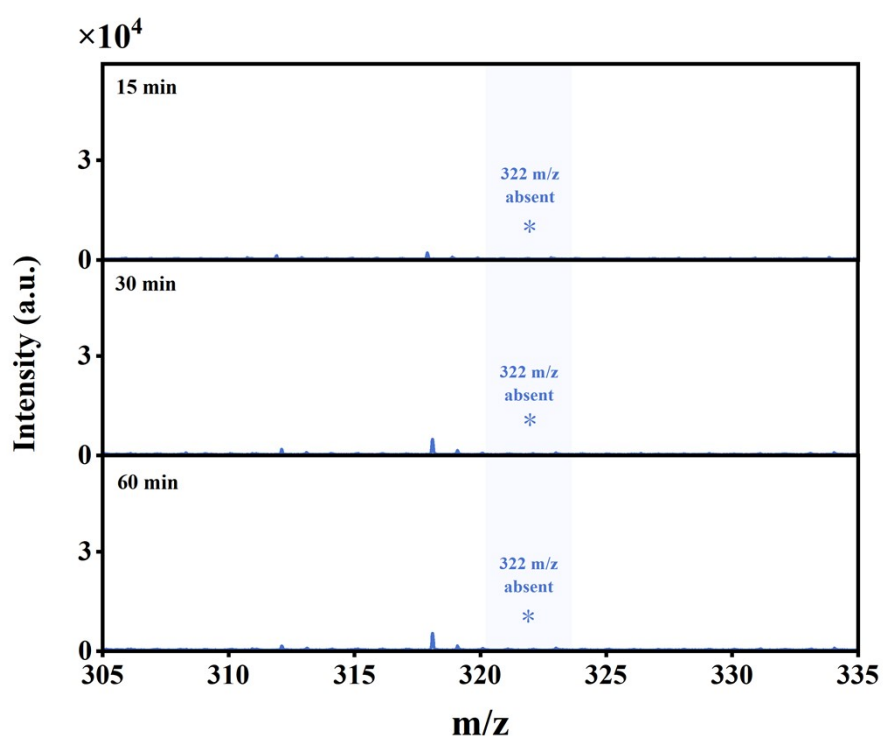

**Fig. S5.** Representative mass spectra of IMP-1-producing *K. pneumoniae* strains (n = 12) from imipenem hydrolysis assays at different incubation times (15 min, 30 min, and 1 h). In all strains, the [Imipenem + Na]<sup>+</sup> peak at 322 m/z disappeared completely after 15 min.

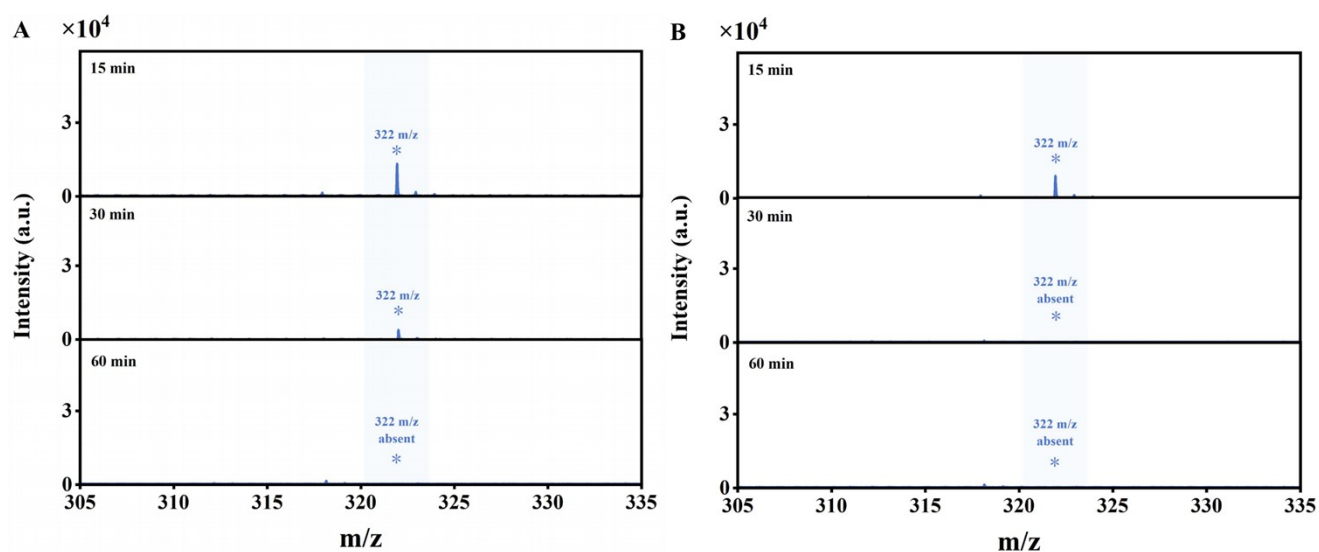

**Fig. S6.** Representative mass spectra of OXA-48–producing *K. pneumoniae* strains ( $n = 2$ ) from imipenem hydrolysis assays at different incubation times (15 min, 30 min, and 1 h). (A) In one strain, the  $[\text{Imipenem} + \text{Na}]^+$  peak at 322 m/z persisted at 15 and 30 min but disappeared after 60 min. (B) In the other strain, the 322 m/z peak was still detectable at 15 min but disappeared completely after 30 min.

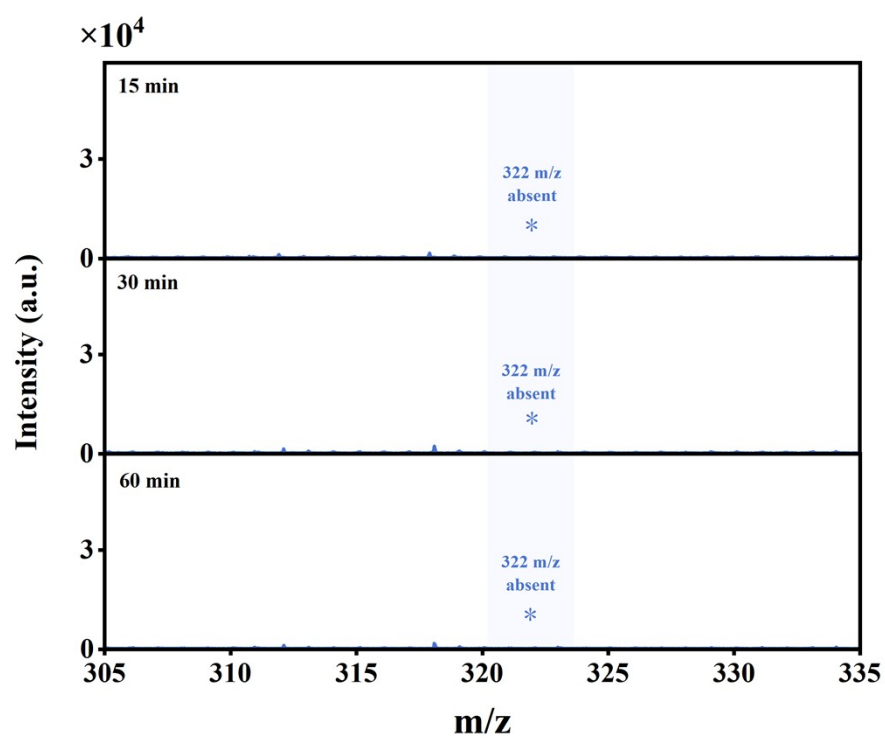

**Fig. S7.** Representative mass spectra of KPC-3-producing *K. pneumoniae* strains ( $n = 2$ ) from imipenem hydrolysis assays at different incubation times (15 min, 30 min, and 1 h). In both strains, the  $[\text{Imipenem} + \text{Na}]^+$  peak at 322  $m/z$  disappeared completely after 15 min.

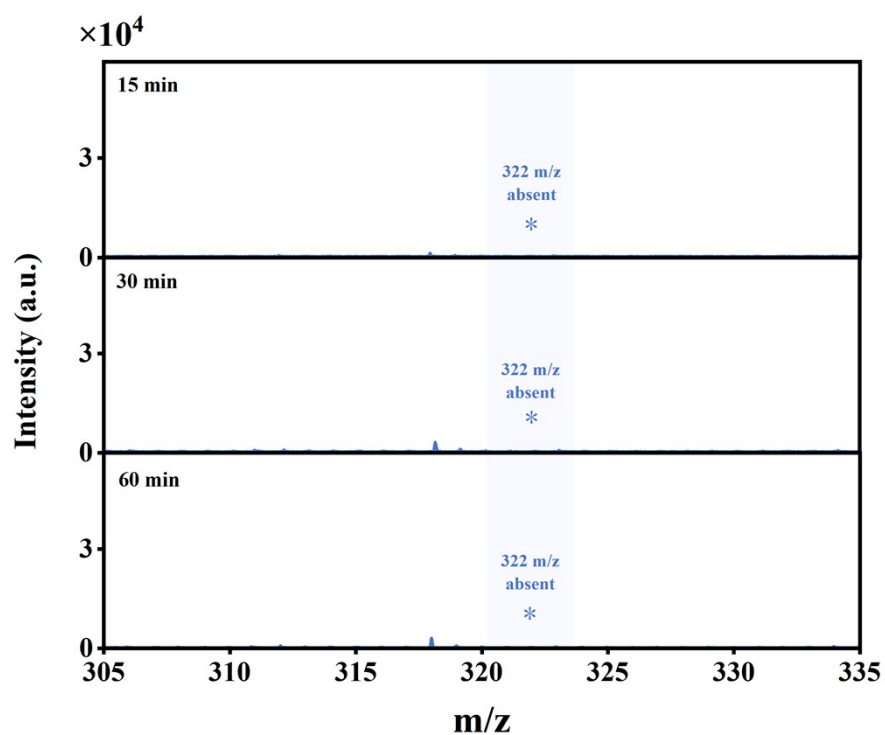

**Fig. S8.** Representative mass spectra of *K. pneumoniae* strains co-producing KPC-2 and IMP-1 ( $n = 2$ ) from imipenem hydrolysis assays at different incubation times (15 min, 30 min, and 1 h). In both strains, the  $[\text{Imipenem} + \text{Na}]^+$  peak at 322 m/z disappeared completely after 15 min.

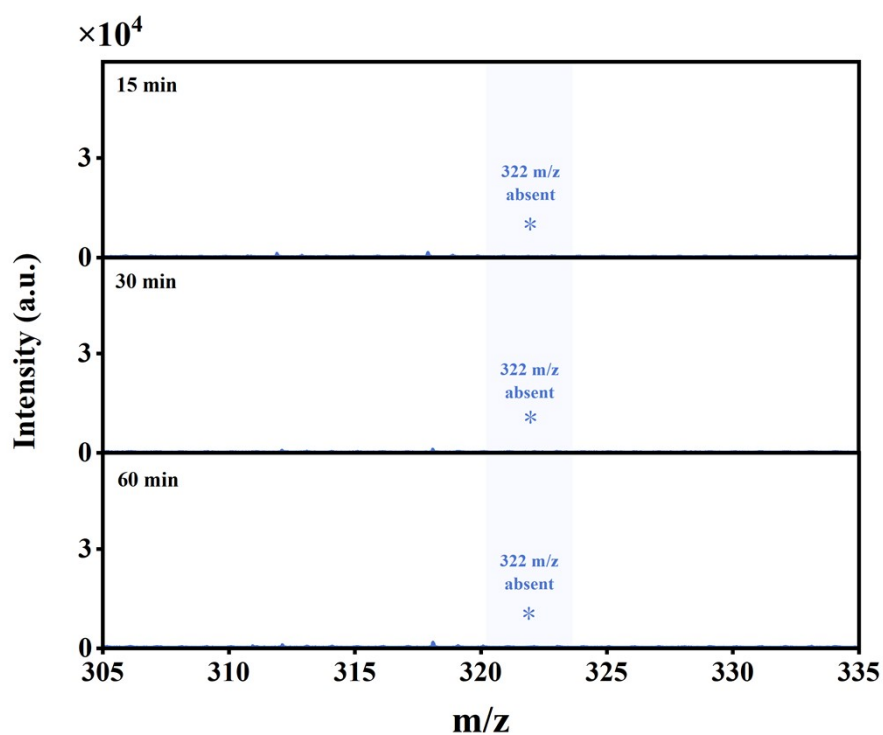

**Fig. S9.** Representative mass spectra of an IMP-4-producing *K. pneumoniae* strain (n = 1) from imipenem hydrolysis assays at different incubation times (15 min, 30 min, and 1 h). The [Imipenem + Na]<sup>+</sup> peak at 322 m/z disappeared completely after 15 min.

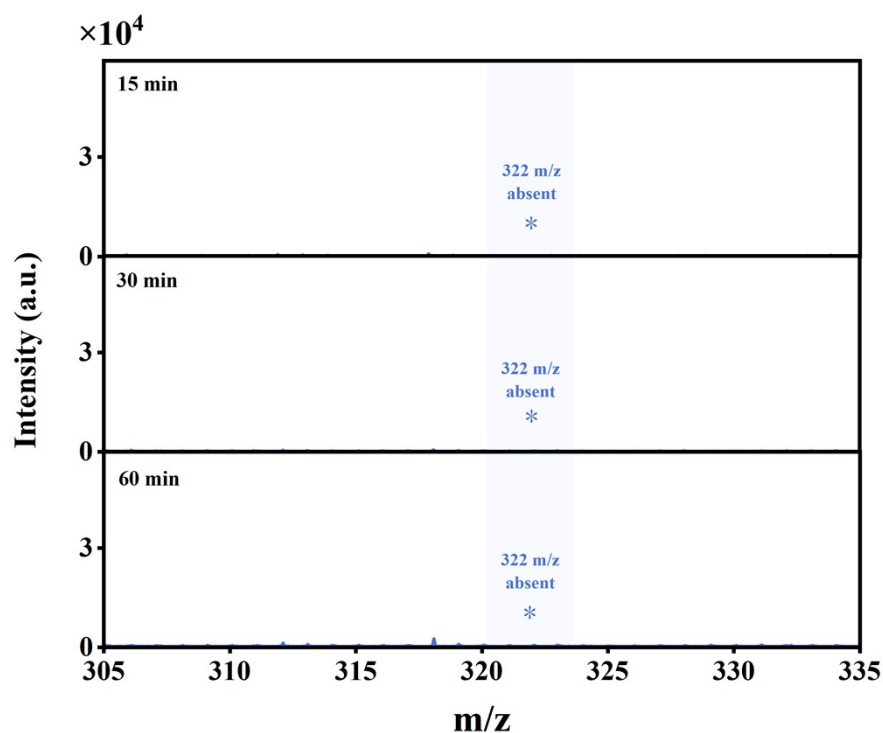

**Fig. S10.** Representative mass spectra of the *K. pneumoniae* strain co-producing KPC-2 and NDM-1 ( $n = 1$ ) from imipenem hydrolysis assays at different incubation times (15 min, 30 min, and 1 h). The  $[\text{Imipenem} + \text{Na}]^+$  peak at 322 m/z disappeared completely after 15 min of incubation.

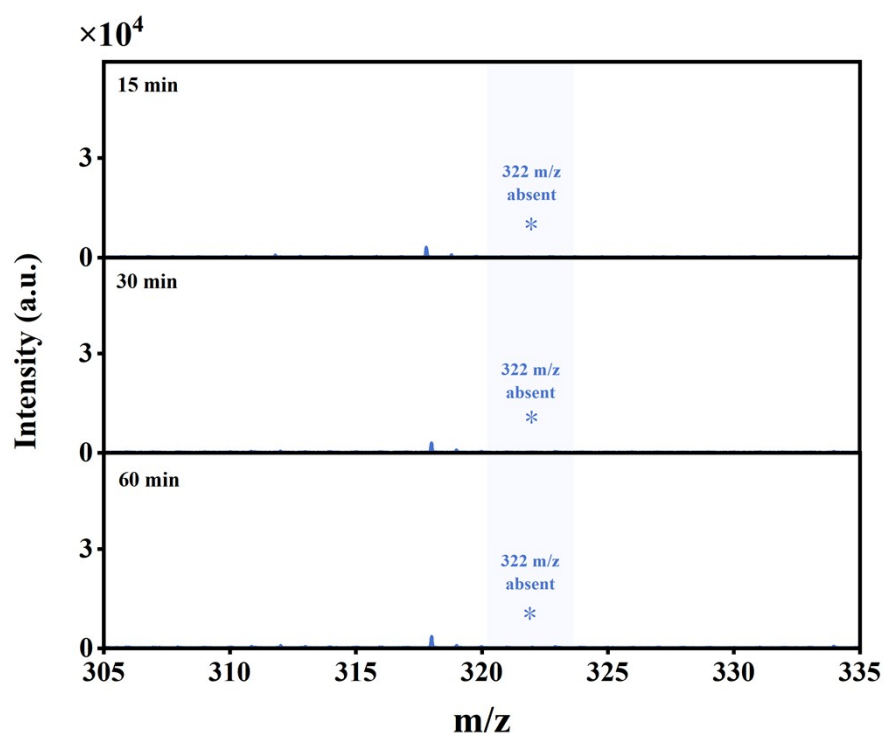

**Fig. S11.** Representative mass spectra of the *K. pneumoniae* strain co-producing KPC-2 and IMP-4 ( $n = 1$ ) from imipenem hydrolysis assays at different incubation times (15 min, 30 min, and 1 h). The  $[\text{Imipenem} + \text{Na}]^+$  peak at 322  $m/z$  disappeared completely after 15 min of incubation.
